# Supplementary material for: Predictors of Spontaneous Remodelling of Angular Knee Deformities in Children with Healed Nutritional Rickets: A Prospective Cohort Study Protocol
Source: Preprints.org preprint supplement (doi:10.20944/preprints202108.0304.v1), 2021-08-13
Supplement: Supplementary file 1 [file supplementary]

**
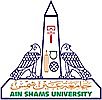
**

**موجبات الإستعدال التلقائي لتشوهات الركبة الإكْليلْية في الأطفال المصابين بالكساح الخامل الناتج من العوز التَغذَويّ, أطروحة علمية لدراسة إستباقية تحليلية**

**ملخص البحث**

**المقدمة و المغزى من البحث**

يعتبر مرض لين العظام في الأطفال او الكُساح الناتج من العوز التَغذَويّ من الأمراض المستشرية على نطاق واسع حول العلم و خصوصاً في الدول النامية و قليلة الموارد. و من العلامات الجلية لهذا المرض ظهور تشوهات عظمية بعموم الجهاز الهيكلي و غالباً ما تتسبب تشوهات أو إعوجاجات الأطراف السفلية في صعوبات بالمشي. و من المستقر عليه علمياً أن الأطفال المصابين بالكُساح النشط الناتج من العوز التَغذَويّ يستجيبون بشكل جيد للعلاج الدوائي المتمثل في جرعات كافية من الكالسيوم و فيتامين (د) و في أحيان أخرى ينحسر نشاط المرض بمجرد تغير نمط الحياة بالتعرض الى الشمس المباشرة لفترات معينة مع تناول الكثير من الأغذية المحتوية على نسب عالية من معدن الكالسيوم, و لكن إنحسار نشاط مرض الكساح الناتج من العوز التَغذَويّ و تحوله من نشط إلى خامل لا يعني بالضرورة زوال التشوهات بالأطراف السفلية و خصوصاً حول الركبة, و لقد وجدت إحدى الدراسات أن بعض هذه التشوهات الإكليلية (الركبة الفحجاء و الركبة الروحاء) تُستعدل تلقائياً بمرور الزمن دون الحاة إلى تدخل جراحي, و بالتوازي وجدوا أن البعض الأخر من هذه التشوهات لا تُستعدل بشكل كامل فيتحسن التشوه الإكْليلّي و لكنه لا يختفي نهائياً بحيث تعود الركبة إلى سابق عهدها من الإستقامة.

و النقطة المحورية هنا أن محددات الإستعدال الكامل غير معروفة بدقة من حيث خصائص المريض أو خصائص التشوه او الإعوجاج المفترض أن تُستعدل ركبته تماما دون الحاجة الى اي تدخل جراحي, و هذا هو السؤال الذي يريد هذا البحث الإجابة عنه و إزالة الغموض بشأنه حتى يتمكن الأطباء لاحقاً من إتخاذ قرارات علاجية على أسس أكثر متانة و مستندة إلى براهين طبية يُتعد بها.

**مقاصد البحث**

1. المقصد الأول للبحث هو دراسة التطور الطبيعي و التلقائي لتشوهات الركبة في المستوى الإكليلي في عينة من مرضى لين العظام –الكساح- الخامل و الناتج من من العوز التَغذَويّ.
2. المقصد الثاني للبحث هو دراسة و تحديد العوامل المتغايرة التي قد يكون لها دور في التأثير على قابلية العظام النامية للإستعدال الذاتي او التلقائي مثل عُمْر المريض و شدة التشوه بالركبة و و نوع التشوه إن كان تشوه أفحجي أم أروحي إلى اخره من العوامل المفترضة.

**منهاج البحث و المادة العلمية**

يُخطط لهذه الدراسة أن تكون دراسة إستباقية تحليلية تبحث في التطور الطبيعي لتشوهات الركبة الإكليلية في عينة من خمسين مريضاً على الأقل من مرضى لين العظام –الكساح- الخامل و الناتج من من العوز التَغذَويّ. سيتم قياس مدى التحسن في تشوهات الركبة بواسطة قياس الزاوية الواقعة ما بين المحور الطولي لعظمة الفخذ و المحور الطولي لعظمة الظنبوب و ستقاس هذه الزاوية سريرياً (إكلينيكياً) و بواسطة الأشعة السينية (راديولوجياً) و سيتم متابعة مدى التحسن حالة الركبة من خلال زيارات كل ثلاثة الى ستة أشهر و كذلك للوقوف على حالة الخمول للين العظام و التيقين من عدم دخول المرض في حالة نشاط مجدداً. الفترة القصوى للمتابعة ستكون عاماً كاملاً و يُحدد في نهايتها مدى إستجابة المريض للإستعدال التلقائي لتشوه الركبة و مدى الحاجة لإجراء تدخل جراحي من عدمه.

**الترويج المستقبلي للنتائج و الخلاصات**

بعد إتمام البحث سوف نقدم مسودته و نتائجه الى المجلات الدولية المختصة من أجل تعميم الفائدة للمختصين و كل العاملين في النطاق الصحي المعني من أطباء أطفال و أطباء عامين و جراحين عظام.

**خلاصة البحث**

إن معرفة العوامل و المحددات المختلفة التي تصاحب الإستعدال التلقائي لتشوهات الركبة الإكليلية و تتناسب معها طردياً سيكون له أبعد الأثر على مقومات إتخاذ القرار و وضع الخطط العلاجية الملائمة لمثل هؤلاء المرضى. و سيضع ركيزة هامة لتغيير المماراسات الطبية القائمة و التي لا تستند إلى برهان طبي واضح.

**الباحثون**

- تامر أحمد السبكي و شادي سميرو مصطفى بركة و شادي محمود من وحدة جراحة عظام الأطفال قسم جراحة العظام بكلية الطب جامعة عين شمس
- هبة الصدفي ورنا عبد الحكيم أحمد محمود من وحدة غدد الأطفال قسم طب الأطفال بكلية الطب جامعة عين شمس
